# Supplementary material for: Adsorption of Atrazine by Fe-Mn-Modified Biochar: The Dominant Mechanism of π–π Interaction and Pore Structure
Source: MDPI journal article supplement (doi:10.3390/agronomy12123097), 2022-12-07
Supplement: s1 [file s1]

## **Supplementary Material**

# **Adsorption of Atrazine by Fe-Mn-Modified Biochar: The Dominant Mechanism of $\pi$ - $\pi$ Interaction and Pore Structure**

**Yuan Liang \*, Ben Zhao and Chuqi Yuan**

School of Environmental Science and Engineering, Suzhou University of Science and Technology, Suzhou 215000, China

\* Correspondence: liangyuan@usts.edu.cn

Table S1. Adsorption kinetic model parameters for original biochar and modified

biochar

| Material                          | Pseudo-First-order            |                                                              |                | Pseudo-Second-order           |                                                              |                |
|-----------------------------------|-------------------------------|--------------------------------------------------------------|----------------|-------------------------------|--------------------------------------------------------------|----------------|
|                                   | Qe/<br>(mg•kg <sup>-1</sup> ) | k <sub>1</sub> /<br>(g•mg <sup>-1</sup> •min <sup>-1</sup> ) | R <sup>2</sup> | Qe/<br>(mg•kg <sup>-1</sup> ) | k <sub>2</sub> /<br>(g•mg <sup>-1</sup> •min <sup>-1</sup> ) | R <sup>2</sup> |
| DBC                               | 134317                        | 0.0126                                                       | 0.896          | 1423.70                       | 0.00131                                                      | 0.960          |
| F <sub>3</sub> M <sub>1</sub> DBC | 3437.32                       | 0.1094                                                       | 0.955          | 3528.73                       | 0.00607                                                      | 0.989          |
| F <sub>1</sub> M <sub>3</sub> DBC | 2414.96                       | 0.0675                                                       | 0.893          | 2504.95                       | 0.00435                                                      | 0.956          |
| MnDBC                             | 2175.45                       | 0.0441                                                       | 0.921          | 2266.43                       | 0.00295                                                      | 0.978          |
| FeDBC                             | 1413.85                       | 0.0335                                                       | 0.824          | 1489.43                       | 0.00311                                                      | 0.915          |

Table S2. Elovich kinetic model parameters for original biochar and modified biochar

| Material                          | First stage |         |       | Second stage |         |       | Third stage |         |       |
|-----------------------------------|-------------|---------|-------|--------------|---------|-------|-------------|---------|-------|
|                                   | $k_1$       | $C_1$   | $R^2$ | $k_2$        | $C_2$   | $R^2$ | $k_3$       | $C_3$   | $R^2$ |
| DBC                               | 0.618       | 157.66  | 0.978 | 0.174        | 590.46  | 0.995 | 0.017       | 1472.61 | 0.944 |
| F <sub>3</sub> M <sub>1</sub> DBC | 0.628       | 2452.87 | 0.951 | 0.074        | 3232.18 | 0.957 | 0.0086      | 3575.63 | 0.998 |
| F <sub>1</sub> M <sub>3</sub> DBC | 0.633       | 1351.99 | 0.971 | 0.132        | 1950.40 | 0.975 | 0.015       | 2508.77 | 0.846 |
| MnDBC                             | 0.945       | 768.15  | 0.955 | 0.086        | 1842.58 | 0.965 | 0.020       | 2198.98 | 0.992 |
| FeDBC                             | 0.564       | 467.79  | 0.996 | 0.171        | 1026.41 | 0.995 | 0.043       | 1707.66 | 0.997 |

Table S3. The adsorption isothermal models parameters for original biochar and modified biochar

| Material                          | Langmuir model            |                         |                | Freundlich model |       |                |
|-----------------------------------|---------------------------|-------------------------|----------------|------------------|-------|----------------|
|                                   | Qm<br>mg•kg <sup>-1</sup> | b<br>L•mg <sup>-1</sup> | R <sup>2</sup> | K <sub>F</sub>   | 1/n   | R <sup>2</sup> |
| DBC                               | 2321.51                   | 0.390                   | 0.932          | 953.50           | 0.239 | 0.991          |
| F <sub>3</sub> M <sub>1</sub> DBC | 7993.44                   | 2.798                   | 0.915          | 4155.28          | 0.235 | 0.931          |
| F <sub>1</sub> M <sub>3</sub> DBC | 4854.88                   | 0.540                   | 0.975          | 1899.83          | 0.269 | 0.981          |
| MnDBC                             | 4838.39                   | 0.492                   | 0.978          | 1861.22          | 0.274 | 0.982          |
| FeDBC                             | 3907.27                   | 0.425                   | 0.976          | 1508.56          | 0.264 | 0.983          |

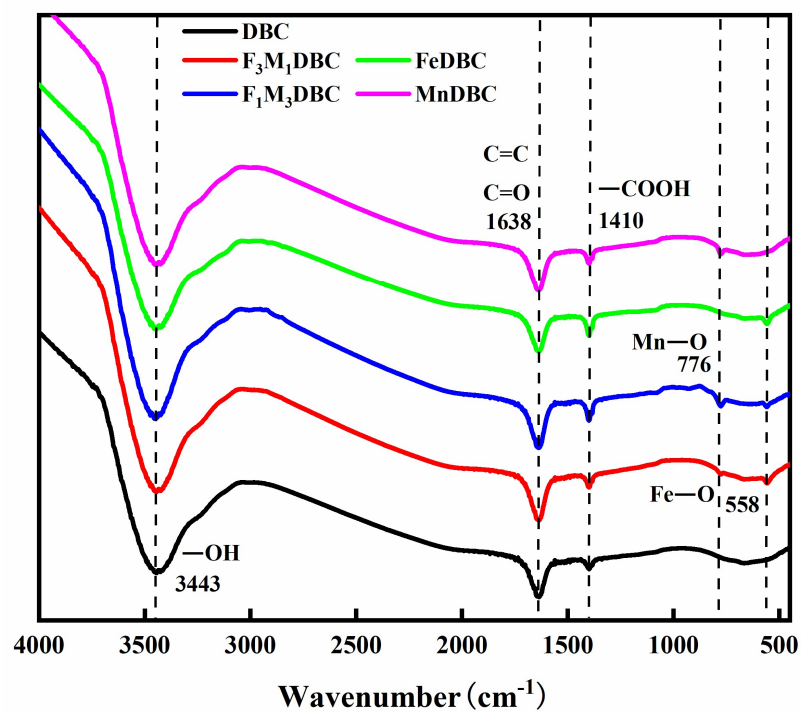

Figure S1. FT-IR spectra of biochar before and after modification

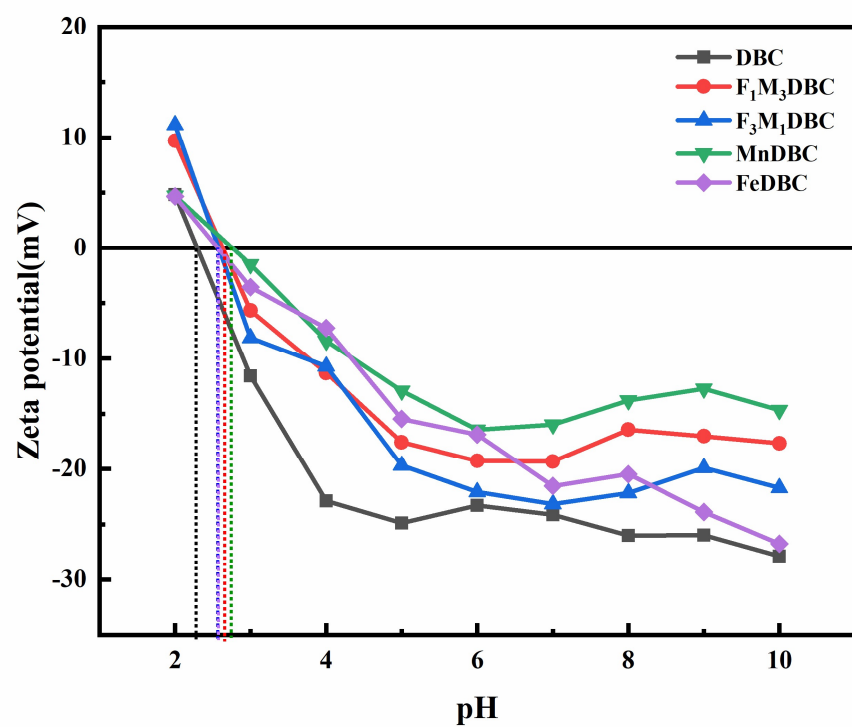

Figure S2. The Zeta potential of the original biochar and modified biochar
